# Supplementary material for: Enhanced NO2 sensing performance of S-doped biomorphic SnO2 with increased active sites and charge transfer at room temperature
Source: Royal Society of Chemistry journal article supplement (doi:10.1039/d0qi00119h), 2020-01-01
Supplement: d0qi00119h1.pdf [file d0qi00119h1.pdf]

## **Enhanced NO<sub>2</sub> sensing performance of S-doped biomorphic SnO<sub>2</sub> with increased active-sites and charge transfer at room temperature**

Wenna Li <sup>a</sup>, Lang He <sup>a</sup>, Xue Bai <sup>a</sup>, Lujia Liu <sup>a</sup>, Muhammad Ikram <sup>a</sup>, He Lv <sup>a</sup>, Mohib Ullah <sup>a</sup>, Mawaz Khan <sup>a</sup>, Kan Kan <sup>\*b</sup>, and Keying Shi <sup>\*a</sup>

<sup>a</sup> *Key Laboratory of Functional Inorganic Material Chemistry, Ministry of Education, School of Chemistry and Material Science, Heilongjiang University, Harbin, 150080, P. R. China. E-mail: shikeying2008@163.com*

<sup>b</sup> *Heilongjiang Academy of Sciences, Institute of Advanced Technology, Harbin 150020, P. R. China. E-mail: kankan.has@foxmail.com*

### **\*Corresponding authors:**

<sup>a</sup> *Key Laboratory of Functional Inorganic Material Chemistry, Ministry of Education, School of Chemistry and Material Science, Heilongjiang University, Harbin 150080, P. R. China. E-mail: shikeying2008@163.com*

<sup>b</sup> *Heilongjiang Academy of Sciences, Institute of Advanced Technology, Harbin 150020, China. E-mail: kankan.has@foxmail.com*

## Table of Contents for Supporting Information

|                                                                                                     |         |
|-----------------------------------------------------------------------------------------------------|---------|
| 1. Fig. S1. SEM of S-BCS-500 and S-BCS-700                                                          | Page S3 |
| 2. Fig. S2. The BET of S-BCS-500 and S-BCS-700                                                      | Page S3 |
| 3. Fig. S3. DRIFT spectra of S-BCS-600                                                              | Page S4 |
| 4. Fig. S4. Gas sensing dynamic curves of S-BCS-500 and S-BCS-700                                   | Page S4 |
| 5. Fig. S5. Sensitivity of S-BCS and BCS-450 and the calibration curve of S-BCS-600                 | Page S5 |
| 6. Fig. S6. XPS of fresh S-BCS-600 and used sample: Sn 3d and O 1s                                  | Page S5 |
| 7. Table S1. Sn 3d <sub>5/2</sub> peaks position and peak area ratio (%) of three series of samples | Page S5 |
| 8. Table S2. O 1s peaks position and peak area ratio (%) of three series of samples                 | Page S5 |
| 9. Table S3. Comparison of related works towards NO <sub>2</sub> and other gases                    | Page S6 |
| 10. Table S4. S-BCS-500, S-BCS -600 and S-BCS-700 gas sensing performance to NO <sub>2</sub>        | Page S6 |
| 11. Reference                                                                                       | Page S7 |

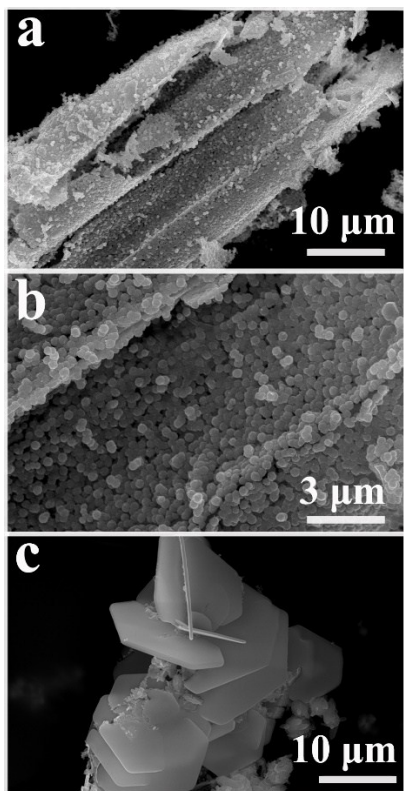

**Fig. S1** (a) SEM of S-BCS-500; (b) Enlarge SEM of (a) shows the morphology of S-BCS-500; (c) SEM of S-BCS-

700.

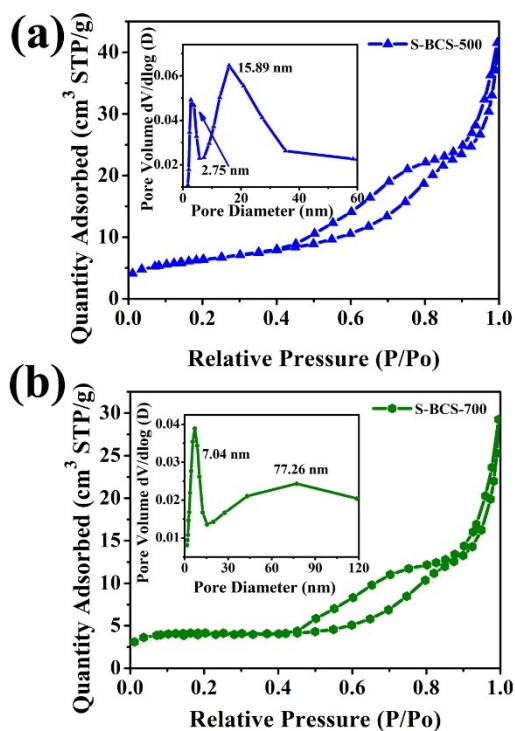

**Fig. S2** The N<sub>2</sub> adsorption-desorption isotherms and pore size distribution (inset) of: (a) S-BCS-500; (b) S-BCS-

700

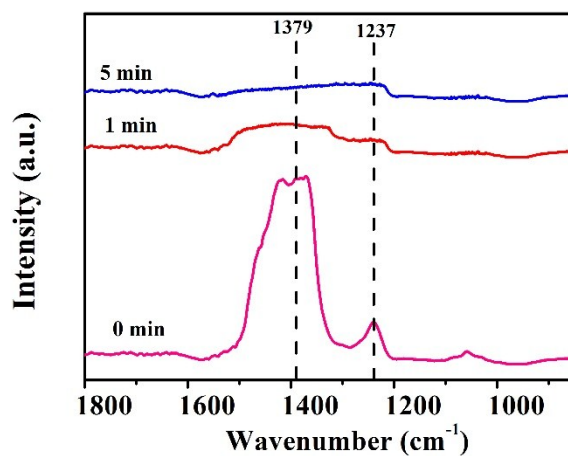

**Fig. S3** DRIFT spectra of S-BCS-600 by passing NO<sub>2</sub> gases at 30 °C for 5 min, then purge by N<sub>2</sub> at 30 °C.

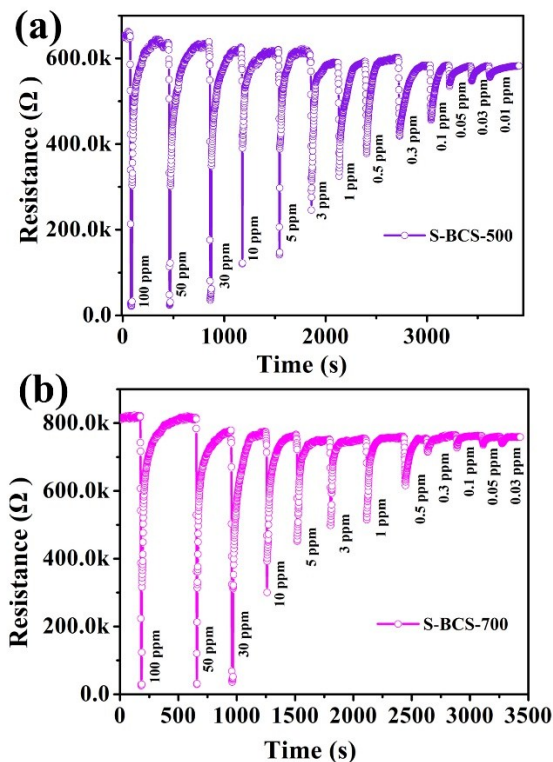

**Fig. S4** Dynamic response-recovery curve and response time of the (a) S-BCS-500; (b) S-BCS-700 sensor to 100-0.01 ppm NO<sub>2</sub> gas at the RT (RH 26%).

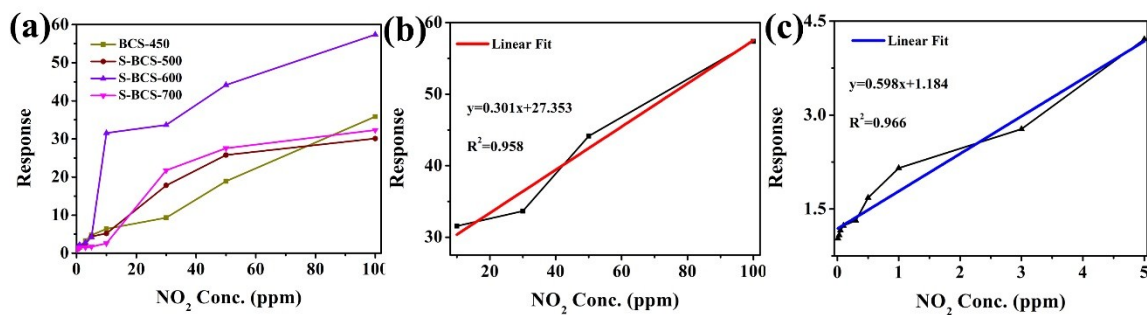

**Fig. S5** (a) Response of S-BCS series samples and BCS-450 to 100 ~ 0.01 ppm NO<sub>2</sub> at RT; the calibration curve of S-BCS-600: (b) 100 ~ 10 ppm NO<sub>2</sub>; (c) 5 ~ 0.01 ppm NO<sub>2</sub>.

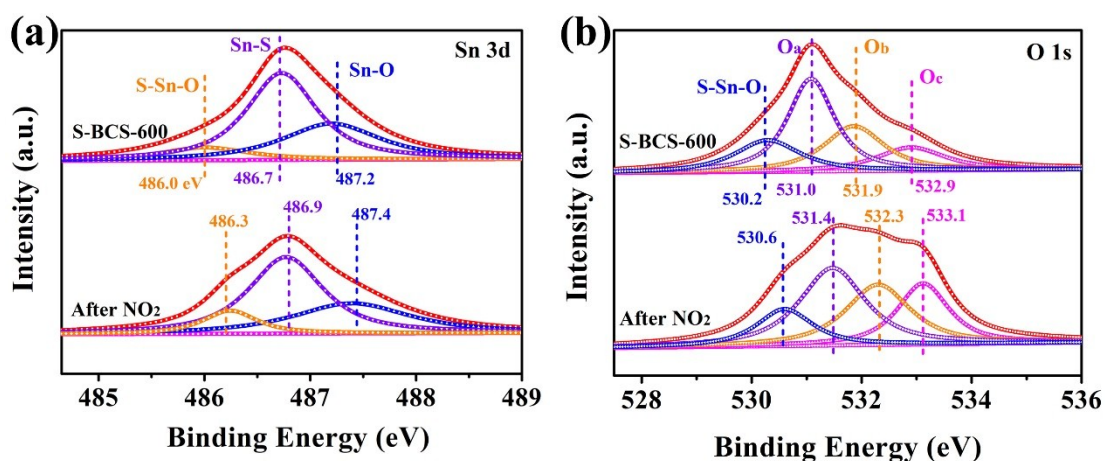

**Fig. S6** XPS of fresh S-BCS-600 and used sample: (a) Sn; (b) O 1s (used sample: contacted with NO<sub>2</sub> for 1 h)

**Table S1.** Sn 3d<sub>5/2</sub> peaks position and peak area ratio (%) of three series of samples

| Sample              | S-BCS-500 |      |        | S-BCS-600 |       |        | S-BCS-700 |       |        |
|---------------------|-----------|------|--------|-----------|-------|--------|-----------|-------|--------|
|                     | Sn-O      | Sn-S | S-Sn-O | Sn-O      | Sn-S  | S-Sn-O | Sn-O      | Sn-S  | S-Sn-O |
| Peak position(eV)   | 487.2     | -    | -      | 487.2     | 486.7 | 486.0  | 487.2     | 486.7 | 486.0  |
| Peak area ratio (%) | 100       | -    | -      | 32.8      | 56.5  | 10.7   | 30.9      | 62.7  | 6.4    |

**Table S2.** O 1s peaks position and peak area ratio (%) of three series of samples

| Sample              | S-BCS-500      |                |                | S-BCS-600      |                |                | S-BCS-700 |                |                |                |        |
|---------------------|----------------|----------------|----------------|----------------|----------------|----------------|-----------|----------------|----------------|----------------|--------|
|                     | O <sub>a</sub> | O <sub>b</sub> | O <sub>c</sub> | O <sub>a</sub> | O <sub>b</sub> | O <sub>c</sub> | S-Sn-O    | O <sub>a</sub> | O <sub>b</sub> | O <sub>c</sub> | S-Sn-O |
| Peak position(eV)   | 531.0          | 531.9          | 532.9          | 531.0          | 531.9          | 532.9          | 530.2     | 531.0          | 531.9          | 532.9          | 530.2  |
| Peak area ratio (%) | 48.1           | 30.1           | 21.8           | 40.4           | 25.3           | 15.0           | 19.3      | 21.3           | 37.8           | 26.9           | 14.0   |

**Table S3.** Comparison of the sensing performances of SnO<sub>2</sub>-based gas sensors and SnS<sub>2</sub>-based gas sensors towards

NO<sub>2</sub> and other gases

| Composite                          | Method             | Target gas               | Temperature (°C) | Response | Detection Limit | Reference |
|------------------------------------|--------------------|--------------------------|------------------|----------|-----------------|-----------|
| SnO <sub>2</sub> -SnS <sub>2</sub> | Oxidation method   | NH <sub>3</sub> (10 ppm) | RT               | 1.16     | 10 ppm          | 1         |
| SnS <sub>2</sub>                   | CVD system         | NO <sub>2</sub> (10 ppm) | RT               | 701%     | 408.9 ppb       | 2         |
| SnS <sub>2</sub>                   | wet chemical route | NO <sub>2</sub> (10 ppm) | 120              | 36       | 1 ppm           | 3         |
| SnO <sub>2</sub> -SnS <sub>2</sub> | Oxidation method   | NO <sub>2</sub> (5 ppm)  | 50               | 600      | 50 ppb          | 4         |
| SnO <sub>2</sub> -SnS <sub>2</sub> | Microwave method   | NO <sub>2</sub> (1 ppm)  | 100              | 51.1     | 125 ppb         | 5         |

|                                     |                      |                            |     |       |                       |           |
|-------------------------------------|----------------------|----------------------------|-----|-------|-----------------------|-----------|
| SnO <sub>2</sub> -SnS <sub>2</sub>  | Oxidation method     | NO <sub>2</sub> (8 ppm)    | 80  | 5.3   | 1 ppm                 | 6         |
| SnS <sub>2</sub>                    | Chemical exfoliation | NO <sub>2</sub> (100 ppm)  | RT  | 2.31  | 20 ppm                | 7         |
| SnS <sub>2</sub> -reduced graphene  | Wet chemical method  | NO <sub>2</sub> (11.9 ppm) | 80  | 56.8% | 0.6 ppm               | 8         |
| SnS <sub>2</sub>                    | Hydrothermal method  | NO <sub>2</sub> (0.5 ppm)  | 120 | 25.4  | couple of tens of ppb | 9         |
| S-doped biomorphic SnO <sub>2</sub> | CVD system           | NO <sub>2</sub> (100 ppm)  | RT  | 57.38 | 10 ppb                | This work |

**Table S4.** Response (R), response time (T<sub>1</sub>) and recovery time (T<sub>2</sub>) of S-BCS-500, S-BCS-600 and S-BCS-700 to NO<sub>2</sub> at RT.

| Sample | S-BCS-500            |      |                   | S-BCS-600         |       |                   | S-BCS-700         |      |                   |
|--------|----------------------|------|-------------------|-------------------|-------|-------------------|-------------------|------|-------------------|
|        | NO <sub>2</sub> /ppm | R    | T <sub>1</sub> /s | T <sub>2</sub> /s | R     | T <sub>1</sub> /s | T <sub>2</sub> /s | R    | T <sub>1</sub> /s |
| 100    | 30.10                | 5.33 | 68.80             | 57.38             | 1.60  | 53.87             | 32.34             | 5.33 | 71.47             |
| 50     | 25.76                | 6.93 | 73.07             | 44.14             | 3.73  | 54.93             | 27.57             | 3.20 | 77.87             |
| 30     | 17.78                | 6.93 | 78.40             | 33.66             | 4.27  | 60.27             | 21.74             | 5.33 | 78.40             |
| 10     | 5.17                 | 5.33 | 84.27             | 31.56             | 4.80  | 62.93             | 2.58              | 5.87 | 73.60             |
| 5      | 4.40                 | 5.87 | 85.33             | 4.21              | 5.87  | 61.33             | 1.70              | 5.33 | 76.27             |
| 3      | 2.48                 | 7.47 | 91.20             | 2.78              | 5.87  | 61.87             | 1.51              | 3.73 | 80.07             |
| 1      | 1.82                 | 5.87 | 89.07             | 2.15              | 6.93  | 62.93             | 1.46              | 3.73 | 86.40             |
| 0.5    | 1.57                 | 7.47 | 97.60             | 1.68              | 6.93  | 67.20             | 1.23              | 6.40 | 84.67             |
| 0.3    | 1.43                 | 6.40 | 97.07             | 1.31              | 6.93  | 68.27             | 1.05              | 3.73 | 90.80             |
| 0.1    | 1.28                 | 5.87 | 89.60             | 1.23              | 7.46  | 68.80             | 1.05              | 4.27 | 94.13             |
| 0.05   | 1.09                 | 3.73 | 85.87             | 1.16              | 7.46  | 70.40             | 1.04              | 6.93 | 92.20             |
| 0.03   | 1.06                 | 5.33 | 84.80             | 1.08              | 8.53  | 74.13             | 1.03              | 8.00 | 90.93             |
| 0.01   | 1.05                 | 5.87 | 140.80            | 1.03              | 13.87 | 76.80             |                   |      |                   |

## Reference

- 1 K. Xu, N. Li, D. Zeng, S. Tian, S. Zhang, D. Hu and C. Xie, Interface Bonds Determined Gas-Sensing of SnO<sub>2</sub>-SnS<sub>2</sub> Hybrids to Ammonia at Room Temperature, *ACS Appl Mater Interfaces*, 2015, **7**, 11359-11368.
- 2 K. C. Kwon, J. M. Suh, T. H. Lee, K. S. Choi, K. Hong, Y. G. Song, Y. S. Shim, M. Shokouhimehr, C. Y. Kang, S. Y. Kim and H. W. Jang, SnS<sub>2</sub> Nanograins on Porous SiO<sub>2</sub> Nanorods Template for Highly Sensitive NO<sub>2</sub> Sensor at Room Temperature with Excellent Recovery, *ACS Sens*, 2019, **4**, 678-686.
3. J. Z. Ou, W. Ge, B. Carey, T. Daeneke, A. Rotbart, W. Shan, Y. Wang, Z. Fu, A. Chrimes and W. Wlodarski, Physisorption Based Charge Transfer in Two-Dimensional SnS<sub>2</sub> for Selective and Reversible NO<sub>2</sub> Gas Sensing.
- 4 K. Xu, S. Tian, J. Zhu, Y. Yang, J. Shi, T. Yu and C. Yuan, High selectivity of sulfur-doped SnO<sub>2</sub> in NO<sub>2</sub> detection at lower operating temperatures, *Nanoscale*, 2018, **10**, 20761-20771.
- 5 J. Hao, D. Zhang, Q. Sun, S. Zheng, J. Sun and Y. Wang, Hierarchical SnS<sub>2</sub>/SnO<sub>2</sub> nanoheterojunctions with increased active-sites and charge transfer for ultrasensitive NO<sub>2</sub> detection, *Nanoscale*, 2018, **10**, 7210-7217.
- 6 D. Gu, X. Li, Y. Zhao and J. Wang, Enhanced NO<sub>2</sub> sensing of SnO<sub>2</sub>/SnS<sub>2</sub> heterojunction based sensor, *Sensors and*

*Actuators B: Chemical*, 2017, **244**, 67-76.

7 Z. Qin, K. Xu, H. Yue, H. Wang, J. Zhang, C. Ouyang, C. Xie and D. Zeng, Enhanced room-temperature NH<sub>3</sub> gas sensing by 2D SnS<sub>2</sub> with sulfur vacancies synthesized by chemical exfoliation, *Sensors and Actuators B: Chemical*, 2018, **262**, 771-779.

8 M. Shafiei, J. Bradford, H. Khan, C. Piloto, W. Wlodarski, Y. Li and N. Motta, Low-operating temperature NO<sub>2</sub> gas sensors based on hybrid two-dimensional SnS<sub>2</sub>-reduced graphene oxide, *Applied Surface Science*, 2018, **462**, 330-336.

9 D. Liu, Z. Tang and Z. Zhang, Nanoplates-assembled SnS<sub>2</sub> nanoflowers for ultrasensitive ppb-level NO<sub>2</sub> detection, *Sensors and Actuators B: Chemical*, 2018, **273**, 473-479.
